# Supplementary material
Source: MDPI journal article supplement (https://www.mdpi.com/2076-3417/12/22/11859)
Supplement: s1 [file s1]

## Supplementary Tables.

**Supplementary Table S1.** Study design, study-specific eligibility criteria and sample characteristics of the included studies.

| Study                           | Study design                                          | Eligibility criteria                                                                                                                                                                                                                                                                         | Sample characteristics                                                                                                                                                                         |
|---------------------------------|-------------------------------------------------------|----------------------------------------------------------------------------------------------------------------------------------------------------------------------------------------------------------------------------------------------------------------------------------------------|------------------------------------------------------------------------------------------------------------------------------------------------------------------------------------------------|
| Bitá et al. 2011 [26]           | retrospective, uncontrolled, repeated measures design | 1.Palatine deficiency, transversal or sagittal<br>2.No previous orthodontic treatment<br>3.No general diseases                                                                                                                                                                               | Sample size: 15 (12 Females, 3 Males)<br>Age in years: 24.6, 19-36 (mean, range)                                                                                                               |
| Rubim de Assis et al. 2010 [27] | retrospective, uncontrolled, repeated measures design | 1.Transversal maxillary deficiency, with at least 5 mm of transversal discrepancy (posterior cross-bite)<br>2.Minimum age of 18 years old<br>3.No previous orthodontic therapy<br>4.Healthy patients                                                                                         | Sample size: 13 (10 Females, 3 Males) (11 Caucasian, 2 Black)<br>Age in years: 26.5, 18-38 (mean, range)                                                                                       |
| Metzler et al. 2014 [23]        | Retrospective before-after study                      | No history of facial surgery                                                                                                                                                                                                                                                                 | Sample size: 12 (6 Females, 6 Males)<br>Age in years: 17.3, 16-34 (mean, range)                                                                                                                |
| Magnusson et al. 2013[ 24]      | Prospective, uncontrolled, repeated measures design   | Real transverse discrepancy according to Jacobs et al.                                                                                                                                                                                                                                       | Sample size: 35 (21 Females, 14 Males)<br>Age in years 19.7, 16.1- 43.9 (mean, range)                                                                                                          |
| Ramieri et al. 2008 [25]        | Prospective, uncontrolled, repeated measures design   | 1.Non-syndromic<br>2.Caucasian<br>3.Adult patients<br>4.No previous history of craniofacial injury or operation<br>5.Patients requiring transverse maxillary expansion (reduced maxillary width with posterior unilateral or bilateral cross-bite, with or without anterior dental crowding) | Sample size: 18 (14 Females, 4 Males)<br>Age in years: 24, 18–35 (mean, range)                                                                                                                 |
| Gungor et al. 2012 [21]         | Retrospective cohort                                  | 1. No previous orthodontic treatment<br>2. No additional fixed appliances during expansion<br>3. Acceptable cooperation                                                                                                                                                                      | Sample size: 28<br>Group A = SARPE: 10 Females, 4 Males<br>Age in years: $19.6 \pm 2.73$ (Mean $\pm$ SD)<br>Group B =RME: 10 Females, 4 Males<br>Age in years: $14.2 \pm 0.74$ (Mean $\pm$ SD) |
| Filho et al. 2002 [20]          | Retrospective cohort                                  | 1.Caucasian adult patients<br>2.Diverse types of malocclusion<br>3.Transversemaxillary deficiency                                                                                                                                                                                            | Sample size: 23 unspecified age-gender distribution<br>Group A = SARPE with conventional UL suture (n=11)<br>Group B = SARPE with V-Y UL suture (n=12)                                         |
| Berger et al. 1999 [22]         | Retrospective cohort                                  | 1.Unilateral and bilateral posterior cross-bite<br>2.Caucasian                                                                                                                                                                                                                               | Sample size: 44<br>Group A (SARPE): 12 Females, 12 Males, mean age: 19.3 years<br>Group B (RME): 9 Females, 11 Males, mean age: 8.6 years                                                      |

|                               |                       |                                                                                                                                                                                                                                                                                                                                                                                                                                                                                                                                                                                                                    |                                                                                                                                                                                                                            |
|-------------------------------|-----------------------|--------------------------------------------------------------------------------------------------------------------------------------------------------------------------------------------------------------------------------------------------------------------------------------------------------------------------------------------------------------------------------------------------------------------------------------------------------------------------------------------------------------------------------------------------------------------------------------------------------------------|----------------------------------------------------------------------------------------------------------------------------------------------------------------------------------------------------------------------------|
| Nada et al. 2013 [22]         | Prospective NRCT      | <p><b><u>Inclusion criteria:</u></b></p> <ol style="list-style-type: none"> <li>1. Skeletal maturity</li> <li>2. Skeletal transverse maxillary deficiency combined with another skeletal discrepancy requiring orthognathic surgical intervention</li> <li>3. No developmental deformity</li> </ol> <p><b><u>Exclusion criteria:</u></b></p> <ol style="list-style-type: none"> <li>1. Presence of developmental deformity</li> <li>2. Absence of more than four teeth in the posterior maxillary arch</li> <li>3. Lips not being in rest position during the CBCT scan acquisition</li> </ol>                     | <p>Sample size:40</p> <p>Group A (Hyrax): 19 Females, 6 Males, mean age <math>\pm</math> SD: 25.4<math>\pm</math>9</p> <p>Group B (TPD): 8 Females, 7 Males, mean age <math>\pm</math> SD: 30<math>\pm</math>10</p>        |
| Nada et al. 2013 [19]         | Prospective NRCT      | <p><b><u>Inclusion criteria</u></b></p> <ol style="list-style-type: none"> <li>1. Skeletal maturity</li> <li>2. Skeletal transverse maxillary deficiency &gt; 5 mm combined with another skeletal discrepancy that required orthognathic surgical intervention</li> <li>3. No developmental deformity.</li> </ol> <p><b><u>Exclusion criteria</u></b></p> <ol style="list-style-type: none"> <li>1. Presence of developmental deformity</li> <li>2. Signs of fluid accumulation in the maxillary sinuses on the CBCT images</li> <li>3. Absence of more than four teeth in the posterior maxillary arch</li> </ol> | <p>Sample size= 32</p> <p>Group A (Hyrax): 14 Females, 5 Males, mean age <math>\pm</math> SD: 24.2<math>\pm</math>7.0</p> <p>Group B (TPD): 7 Females, 6 Males, mean age <math>\pm</math> SD: 31.9<math>\pm</math>10.0</p> |
| Antonini et al. 2013 [17]     | RCT                   | <ol style="list-style-type: none"> <li>1. Indication for SARME</li> <li>2. The presence of all natural anterior maxillary teeth</li> <li>3. Age older than 18 years</li> <li>4. No history of facial surgery, trauma, pathologies, anomalies, or syndromes involving the UL or maxilla</li> <li>5. Absence of systemic or local illness that could interfere with wound healing</li> </ol>                                                                                                                                                                                                                         | <p>Sample size: 21</p> <p>Group A (SARPE - Bard-Parker #15 scalpel blade): 8 Females, 3 Males, mean age: 32.7 years</p> <p>Group B (SARPE – monopolar electrocautery): 6 Females, 4 Males mean age: 27.5 years</p>         |
| Zupan et al. 2022 [28]        | Retrospective, cohort | <p><b><u>Inclusion criteria:</u></b></p> <p>Transverse discrepancy between the maxilla and mandible greater than 7 mm.</p> <p><b><u>Exlusion criteria:</u></b></p> <p>history and presentation of any congenital dentofacial deformity and facial asymmetries.</p>                                                                                                                                                                                                                                                                                                                                                 | <p>Sample size: 15 (8 Females, 7 Males)</p> <p>Age in years: 26.<math>\pm</math>9.0</p>                                                                                                                                    |
| Karabiber et Yilmaz 2021 [29] | Retrospective cohort  | <ol style="list-style-type: none"> <li>1. Patients older than 17 years,</li> <li>2. Patients having TUPC and treated with unilateral SARME,</li> <li>3. No history of craniofacial abnormalities or serious medical conditions, and</li> <li>4. Having three-dimensional records from before and 6</li> <li>5. months after the expansion</li> </ol>                                                                                                                                                                                                                                                               | <p>Sample size: 16 (8 Females, 8 Males)</p> <p>Age in years: 18.38.<math>\pm</math>1.45</p>                                                                                                                                |

|                        |                                              |                                                                                                                                                                                                                                                                                                                                                                                                                                                                                                                                                                                                                     |                                                                                                                                                                                                                                |
|------------------------|----------------------------------------------|---------------------------------------------------------------------------------------------------------------------------------------------------------------------------------------------------------------------------------------------------------------------------------------------------------------------------------------------------------------------------------------------------------------------------------------------------------------------------------------------------------------------------------------------------------------------------------------------------------------------|--------------------------------------------------------------------------------------------------------------------------------------------------------------------------------------------------------------------------------|
| Dias et al. 2021 [30]  | retrospective cohort                         | Exclusion criteria:<br>did not perform CBCT at the correct time,<br>did not respect<br>the preoperative and postoperative protocol (medication use, diet, etc), abandoned treatment for any reason, had a history of nasal septum surgery, used drugs with interference in bone metabolism (long-term corticosteroids, bisphosphonates, etc), underwent a new surgical intervention in the same place, Hyrax palatal expansion device used for expansion presented with a problem during the period of follow-up or activation, and had any syndrome that could somehow interfere with the results of the research. | Sample size: 26<br>Mean age: 30.58                                                                                                                                                                                             |
| Jesus et al. 2021 [31] | retrospective, non-randomized clinical study | <b>Inclusion criteria:</b><br>1. availability of initial CBCT images (before any treatment) of subjects<br>2. complete skeletal maturity (confirmed by examination of the cervical vertebrae;<br>3. cervical vertebral maturation stage (CVMS)<br>4. V from the Hassel and Farman analysis, as modified by Baccetti et al.<br>5. patients of both sexes,<br>6. availability of CBCT images obtained after treatment.<br><b>Exclusion criteria:</b><br>1. Imaging after any previous orthodontic treatment,<br>2. incomplete skeletal maturation<br>3. cleft lip and palate<br>4. syndromic conditions.              | Sample size:36<br>Group 1: patients treated with MARPE :12 patients<br>Group 2:patients treated with SARPE without a cinch, and those 12 patients<br>Group 3: treated with SARPE with a cinch. :12 patients<br>Age range:15-39 |
|                        |                                              |                                                                                                                                                                                                                                                                                                                                                                                                                                                                                                                                                                                                                     |                                                                                                                                                                                                                                |

**Supplementary Table S2.** The orthognathic procedures, the expanders and the expansion protocols as well as the comparison groups for all the included studies.

| Study                 | Orthognathic procedure                                                                                                                                                                 | Expander                                | Expansion protocol                                                                                                                                                          | Interventions Comparator        |
|-----------------------|----------------------------------------------------------------------------------------------------------------------------------------------------------------------------------------|-----------------------------------------|-----------------------------------------------------------------------------------------------------------------------------------------------------------------------------|---------------------------------|
| Bitá et al. 2011 [26] | LeFort I osteotomies or incomplete LeFort I osteotomies, without the osteotomy of the nasal septum, followed by midline sagittal osteotomy, alar cinch suture and alar base V-Y suture | Tooth-borne expander (unspecified type) | <b>Expansion starts</b> 5-7 days postoperatively<br><b>Expansion rate</b> unspecified<br><b>Expansion ends</b> until cross-bite is annulated<br><b>Retention</b> 4-6 months | Only SARPE (uncontrolled study) |

|                                 |                                                                                                                                                          |                                                                                             |                                                                                                                                                                                                                                                                                                                                                                                                |                                                                                       |
|---------------------------------|----------------------------------------------------------------------------------------------------------------------------------------------------------|---------------------------------------------------------------------------------------------|------------------------------------------------------------------------------------------------------------------------------------------------------------------------------------------------------------------------------------------------------------------------------------------------------------------------------------------------------------------------------------------------|---------------------------------------------------------------------------------------|
| Rubim de Assis et al. 2010 [27] | Subtotal Le Fort I osteotomy without nasal septum osteotomy nor pterygomaxillary disjunction, followed by midline sagittal osteotomy and a V-Y suture    | Tooth-borne expander (Hyrax)                                                                | <p><b><u>Expansion starts</u></b><br/>5 days postoperatively with 1 mm expansion at day 1</p> <p><b><u>Expansion rate</u></b><br/>twice daily (0.5mm/d) for 6 days; pause for 5 days; twice daily (0.5mm/d) for 7 days</p> <p><b><u>Expansion ends</u></b><br/>no cross-bite</p> <p><b><u>Retention</u></b><br/>at least 4 months with Hyrax, then replaced by URA for a total of 6 months</p> | Only SARPE (uncontrolled study)                                                       |
| Metzler et al. 2014 [23]        | Subtotal Le Fort I osteotomy including the pterygomaxillary junction, followed by midline sagittal osteotomy, alar cinch suture and alar base V-Y suture | Tooth-borne expander (Haas type)                                                            | <p><b><u>Expansion starts</u></b><br/>5 days postoperatively</p> <p><b><u>Expansion rate</u></b><br/>twice daily (1mm/d)</p> <p><b><u>Expansion ends</u></b><br/>3 mm overcorrection</p> <p><b><u>Retention</u></b><br/>at least 12 weeks</p>                                                                                                                                                  | Only SARPE (uncontrolled study)                                                       |
| Magnusson et al. 2013 [24]      | Le Fort I osteotomy without pterygomaxillary disjunction, followed by midline sagittal osteotomy. Neither alar cinch suture or V- Y sutures performed    | Tooth-borne expander (Hyrax)                                                                | <p><b><u>Expansion starts</u></b><br/>5 days postoperatively</p> <p><b><u>Expansion rate</u></b><br/>twice daily (0.5 mm/d)</p> <p><b><u>Expansion ends</u></b><br/>bilateral overexpansion of half a molar-cusp width</p> <p><b><u>Retention</u></b><br/>90 days</p>                                                                                                                          | Only SARPE (uncontrolled study)                                                       |
| Ramieri et al. 2008 [25]        | Le Fort I osteotomy, with the pterygomaxillary disjunction, followed by midline sagittal osteotomy. No report on either alar cinch suture or V-Y sutures | Bone-anchored distraction device (Surgi-Tec NV, Brugge, Belgium)                            | <p><b><u>Expansion starts</u></b><br/>7 days postoperatively</p> <p><b><u>Expansion rate</u></b><br/>once daily (0.33 mm/d for 7 days; 0.6 mm/d thereafter)</p> <p><b><u>Expansion ends</u></b><br/>the active expansion required 2-3 weeks (until the amount of width increase required was achieved)</p> <p><b><u>Retention</u></b><br/>4–6 months</p>                                       | Only bone-anchored transverse palatal distraction (uncontrolled study)                |
| Gungor et al. 2012 [21]         | Le Fort I osteotomy without pterygomaxillary disjunction, followed by midline sagittal osteotomy. Alar cinch suture and V-Y sutures performed            | <p><b><u>Group A</u></b><br/>Banded Hyrax</p> <p><b><u>Group B</u></b><br/>Bonded Hyrax</p> | <p><b><u>Expansion starts</u></b><br/>B: 1 mm at day 1, pause 7 days post-operative</p> <p><b><u>Expansion rate</u></b><br/>A, B: twice daily (0.5 mm/d)</p> <p><b><u>Expansion ends</u></b><br/>when palatal cusps of upper molars were on the buccal cusps of lower molar</p> <p><b><u>Retention</u></b><br/>A, B: 4 months</p>                                                              | <p><b><u>Group A</u></b><br/>SARPE</p> <p>vs</p> <p><b><u>Group B</u></b><br/>RME</p> |

|                           |                                                                                                                                                                                                                                                                                                                                           |                                                                        |                                                                                                                                                                                                                                   |                                                                                                                                         |
|---------------------------|-------------------------------------------------------------------------------------------------------------------------------------------------------------------------------------------------------------------------------------------------------------------------------------------------------------------------------------------|------------------------------------------------------------------------|-----------------------------------------------------------------------------------------------------------------------------------------------------------------------------------------------------------------------------------|-----------------------------------------------------------------------------------------------------------------------------------------|
| Filho et al. 2002 [20]    | Le Fort I osteotomy without pterygomaxillary disjunction, followed by midline sagittal osteotomy                                                                                                                                                                                                                                          | Tooth-borne or bone- anchored Hyrax                                    | Unspecified                                                                                                                                                                                                                       | <b>Group A</b> SARPE with conventional suturing of the upper lip<br>vs <b>Group B</b> SARPE with the simple V-Y suture of the upper lip |
| Berger et al. 1999 [22]   | LeFort I osteotomy without pterygomaxillary disjunction. No report on either alar cinch suture or V-Y sutures                                                                                                                                                                                                                             | Bonded acrylic hyrax for both groups                                   | <b>Expansion starts</b> unspecified<br><b>Expansion rate</b> A, B: once daily (unspecified mm/d)<br><b>Expansion ends</b> unspecified<br><b>Retention</b> A, B: 2-3 months                                                        | <b>Group A</b> SARPE<br><br>Vs<br><b>Group B</b> RME                                                                                    |
| Nada et al. 2013 [22]     | Le Fort I osteotomy, with the pterygomaxillary disjunction, followed by midline sagittal osteotomy. Neither alar cinch suture or V- Y sutures performed                                                                                                                                                                                   | A. Tooth-borne hyrax expander<br>B. Bone-borne transpalatal distractor | <b>Expansion starts</b> 7 days postoperatively<br><b>Expansion rate</b> 1 mm/d<br><b>Expansion ends</b> the palatal cusps of the maxillary teeth touched the buccal cusps of the lower dentition<br><b>Retention</b> three months | <b>Group A</b> SARPE (tooth-borne hyrax expander)<br><br>Vs<br><b>Group B</b> SARPE (bone-borne transpalatal distractor)                |
| Nada et al. 2013 [19]     | Le Fort I osteotomy, with the pterygomaxillary disjunction, followed by midline sagittal osteotomy. Neither alar cinch suture or V-Y sutures performed                                                                                                                                                                                    | A. Tooth-borne hyrax expander<br>B. Bone-borne transpalatal distractor | <b>Expansion starts</b> 7 days postoperatively<br><b>Expansion rate</b> 1 mm/d<br><b>Expansion ends</b> the palatal cusps of the maxillary teeth touched the buccal cusps of the lower dentition<br><b>Retention</b> three months | <b>Group A</b> SARPE (tooth-borne hyrax expander)<br><br>Vs<br><b>Group B</b> SARPE (bone-borne transpalatal distractor)                |
| Antonini et al. 2013 [17] | Le Fort I osteotomy without nasal septum osteotomy and pterygoid plate separation, followed by midline sagittal osteotomy, a simple alar cinch and a V-Y suture                                                                                                                                                                           | Unspecified                                                            | Unspecified                                                                                                                                                                                                                       | <b>Group A</b> SARPE (Bard-Parker #15 scalpel blade)<br>vs<br><b>Group B</b> SARPE_(monopolar electrocautery)                           |
| Zupan et al. 2022 [28]    | Subtotal LeFort I osteotomy with an additional median osteotomy of the maxilla and the palate. Osteotomy lines were carried out as in regular LeFort I with complete disjunction in the pterygomaxillary fissure; the only difference was leaving the posterior aspect of the lateral nasal wall around descending palatine artery intact | bone-borne palatal distractor (DePuy Synthes)                          | <b>Expansion starts</b> 7 days postoperatively<br><b>Expansion rate</b> once daily (0.33 mm/d)<br><b>Expansion ends</b> Unspecified<br><b>Retention</b> 4 months                                                                  | Only SARME (uncontrolled study)                                                                                                         |

|                               |                                                                                                                                                                                                                                                                                                                                                          |                                                                                               |                                                                                                                                                                                                                                                                                                                                                                            |                                                                                                                                                               |
|-------------------------------|----------------------------------------------------------------------------------------------------------------------------------------------------------------------------------------------------------------------------------------------------------------------------------------------------------------------------------------------------------|-----------------------------------------------------------------------------------------------|----------------------------------------------------------------------------------------------------------------------------------------------------------------------------------------------------------------------------------------------------------------------------------------------------------------------------------------------------------------------------|---------------------------------------------------------------------------------------------------------------------------------------------------------------|
| Karabiber et Yilmaz 2021 [29] | anterior, lateral, and posterior osteotomies on the C side and osteotomy of the midpalatal suture.                                                                                                                                                                                                                                                       | asymmetrically designed appliance with a hyrax screw.(Hyrax®, Dentaaurum, Ispringen, Germany) | <b><u>Expansion starts</u></b><br>Unspecified<br><b><u>Expansion rate</u></b><br>Twice daily (0.5 mm/d)<br><b><u>Expansion ends</u></b><br>An average of 3 weeks<br><b><u>Retention</u></b><br>6months                                                                                                                                                                     | Only SARME (uncontrolled study)                                                                                                                               |
| Dias et al. 2021 [30]         | osteotomy through the zygomaticomaxillary pillar in the lateral wall of the maxilla to the nasal pyriform aperture on both sides, according to the technique proposed by Bays and Greco; pterygoid plaques and the nasal septum were not osteotomized; a vertical incision was made on the labial frenum ; medial osteotomy between the central incisors | Tooth-borne expander (Hyrax)                                                                  | <b><u>Expansion starts</u></b><br>7 days postoperatively<br><b><u>Expansion rate</u></b><br>Twice daily (1 mm/d)<br><b><u>Expansion ends</u></b><br>Unspecified<br><b><u>Retention</u></b><br>6months                                                                                                                                                                      | Only SARME (uncontrolled study)                                                                                                                               |
| Jesus et al. 2021 [31]        | pterygomaxillary disjunction; midpalatal suture osteotomy, and lateral osteotomy followed or not by an alar base cinch.                                                                                                                                                                                                                                  | Bone anchored RME                                                                             | <b><u>Expansion starts</u></b><br>Group A:Immediately after mini implant placement<br>Group B: 7 days postoperatively<br><b><u>Expansion rate</u></b><br>Group A:Twice daily (0.5 mm/d)<br>Group B: once daily (0.2mm/day)<br><b><u>Expansion ends</u></b><br>Group A:14-18days<br>Group B:until cross bite correction was achieved<br><b><u>Retention</u></b><br>4 months | Group A<br>Miniscrew-assisted rapid palatal expansion (MARPE) Group B<br>surgically assisted rapid palatal expansion (SARPE) with/without an alar base cinch. |

**Supplementary Figure S1.** Graphical summary of the bias analysis for the RCT [17].

|                     |                                             |                                         |                                                           |                                                 |                                          |                                      |
|---------------------|---------------------------------------------|-----------------------------------------|-----------------------------------------------------------|-------------------------------------------------|------------------------------------------|--------------------------------------|
| Antonini et al 2013 | +                                           | ?                                       | ?                                                         | ?                                               | +                                        | +                                    |
|                     | Random sequence generation (selection bias) | Allocation concealment (selection bias) | Blinding of participants and personnel (performance bias) | Blinding of outcome assessment (detection bias) | Incomplete outcome data (attrition bias) | Selective reporting (reporting bias) |
